# Supplementary material
Source: PubMed Central journal article supplement (PMC6500577)

**A Behavioral Signals:**

- Left turn signal
- Left reward signal
- Right turn signal
- Right reward signal

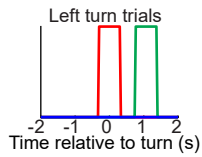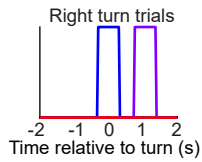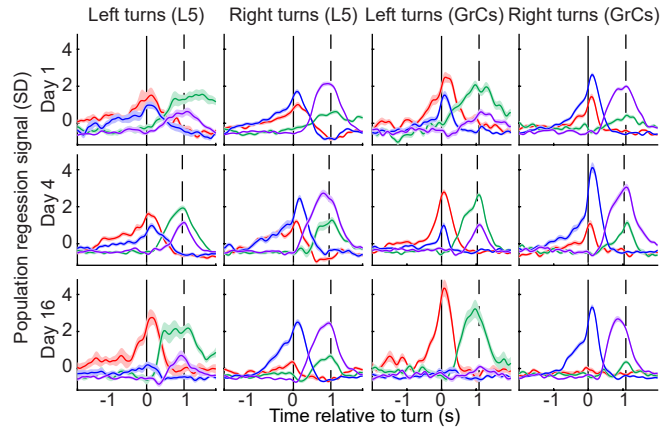**B**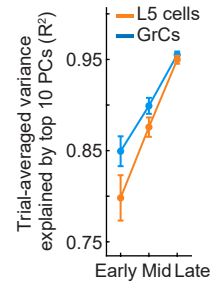**C**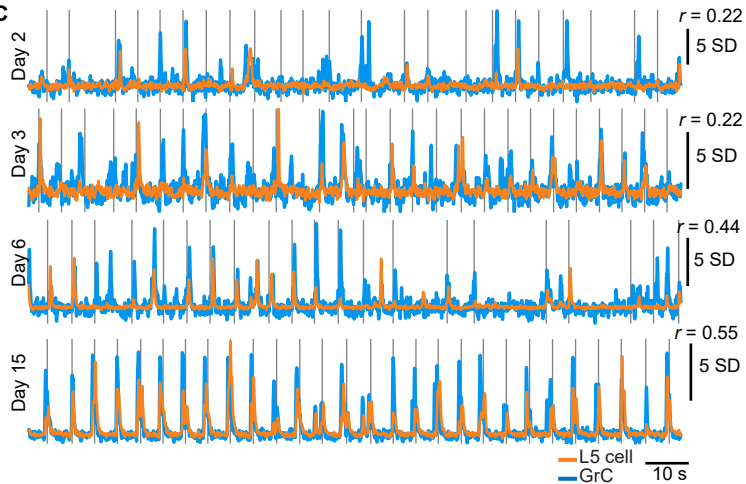**D**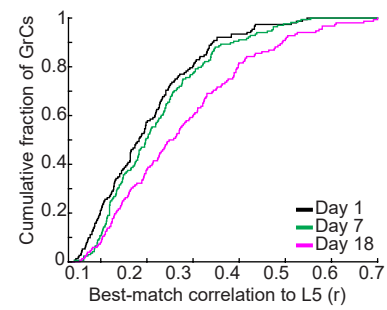**E**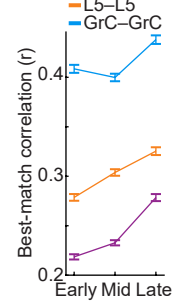**F**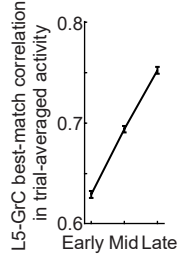**G**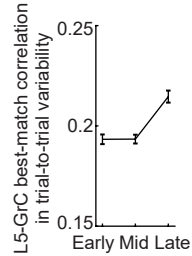**H**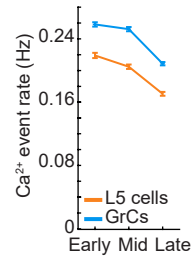**I**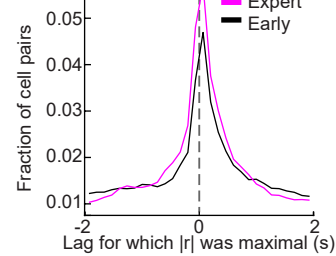

Supplement: NIHMS1521904-supplement-6.pdf [file NIHMS1521904-supplement-6.pdf]
