# Supplementary material
Source: PubMed Central journal article supplement (PMC6500577)

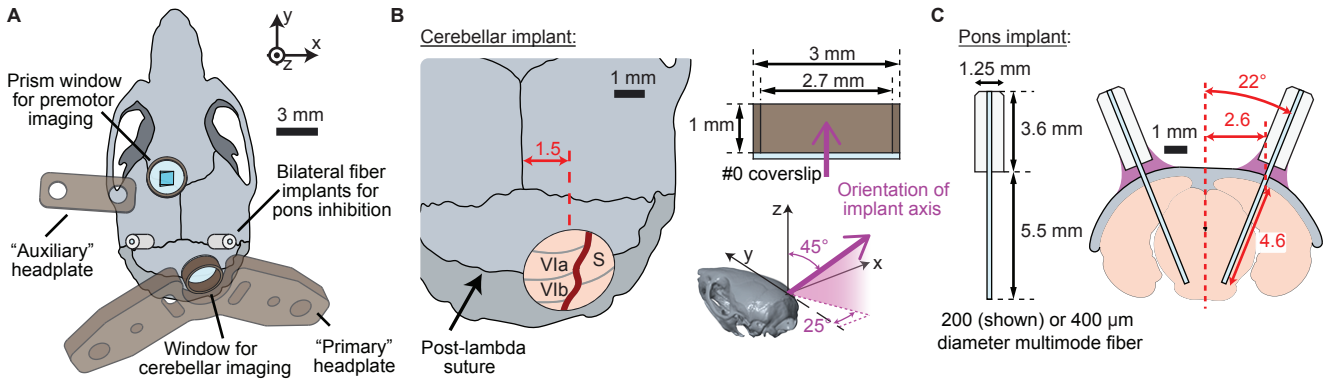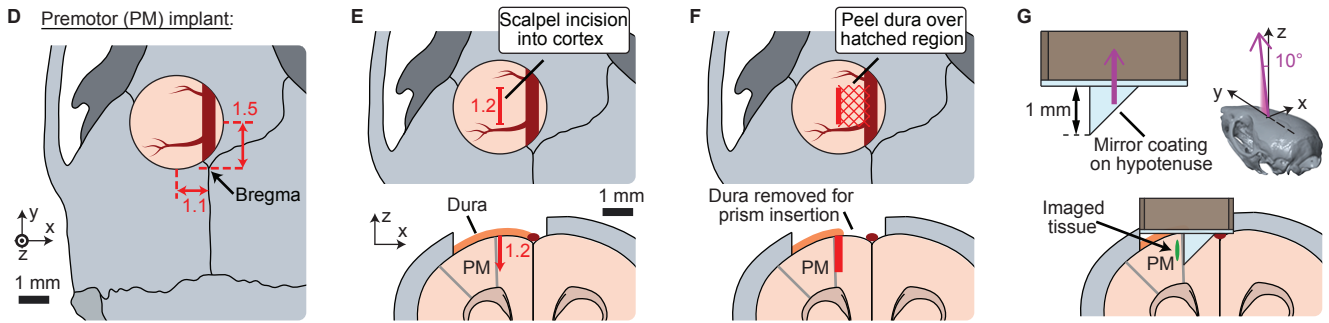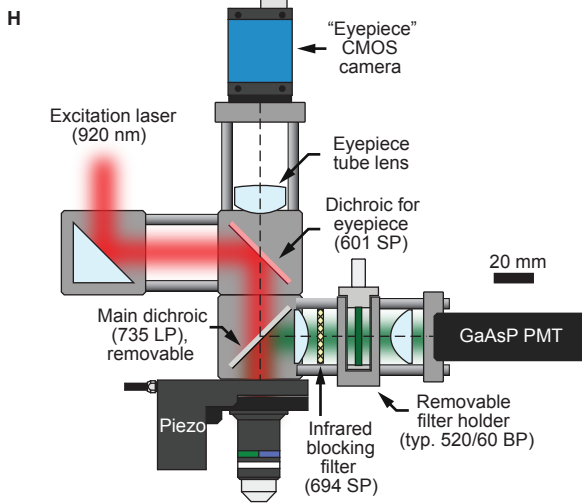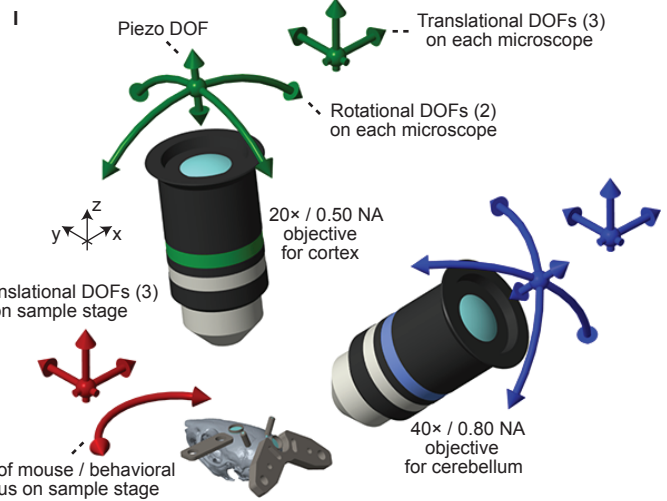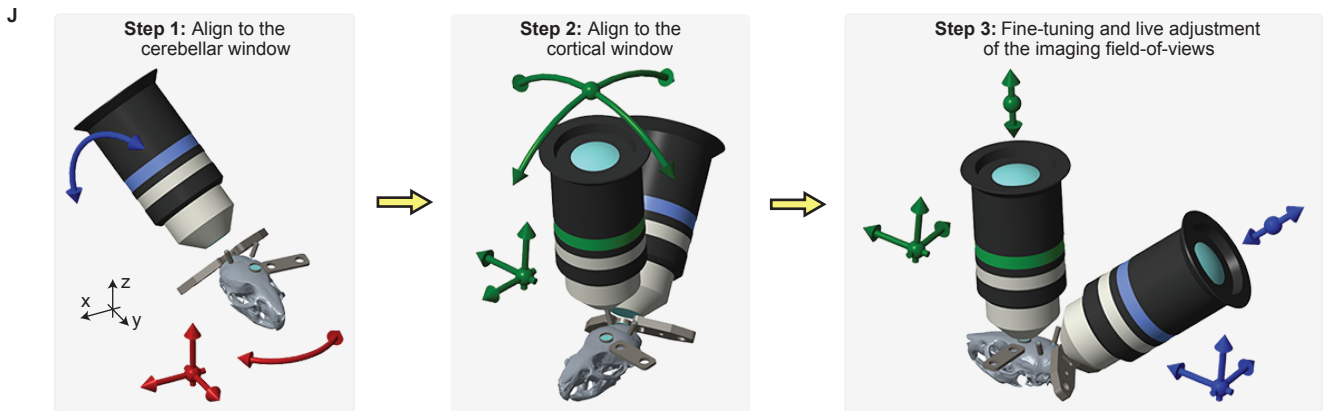

Supplement: NIHMS1521904-supplement-2.pdf [file NIHMS1521904-supplement-2.pdf]

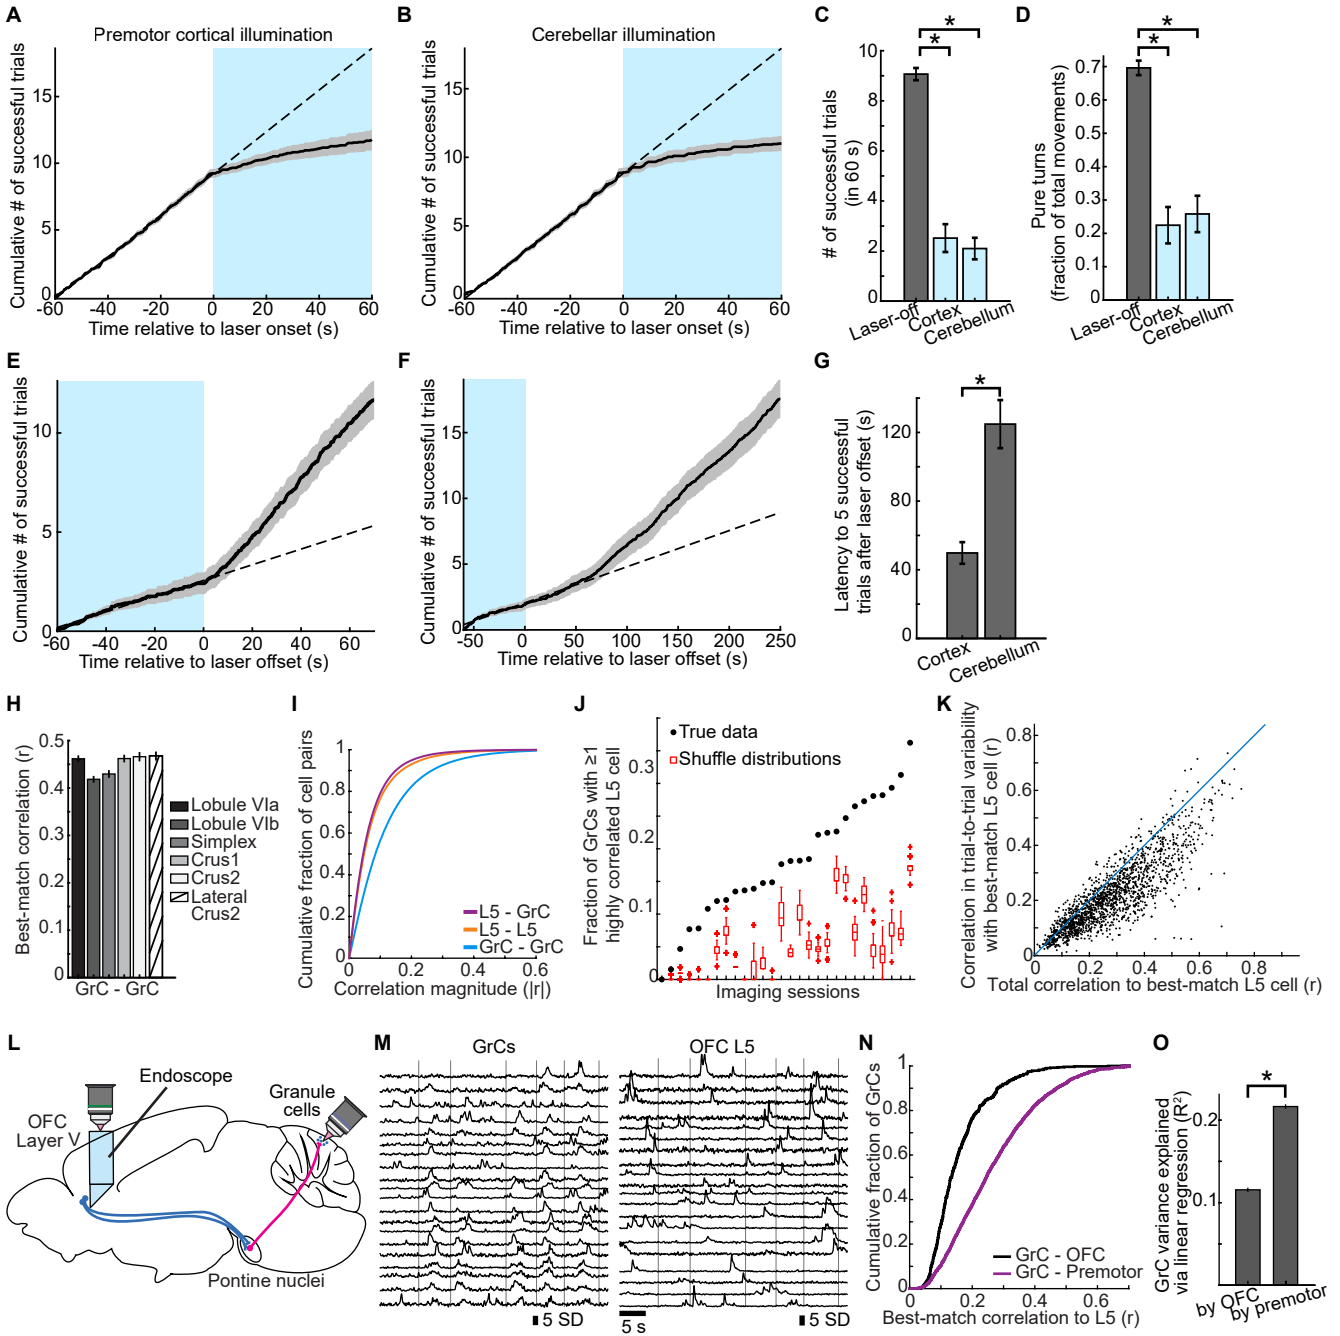

Supplement: NIHMS1521904-supplement-3.pdf [file NIHMS1521904-supplement-3.pdf]

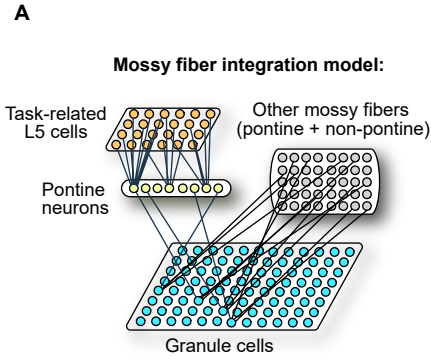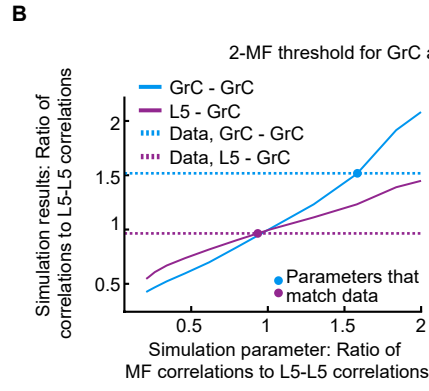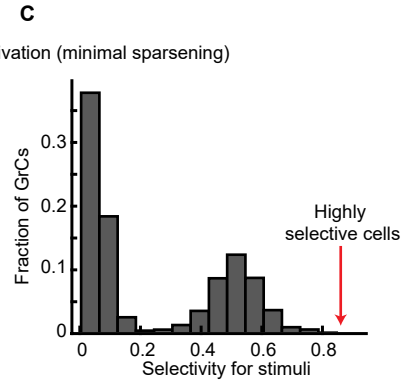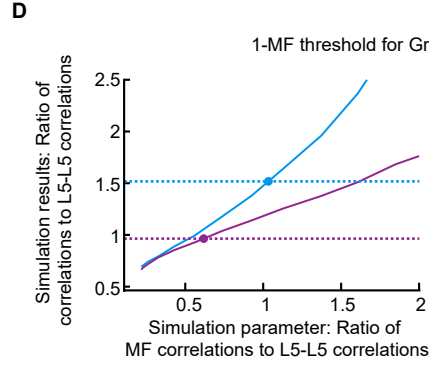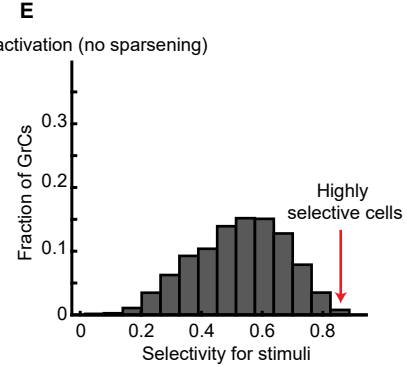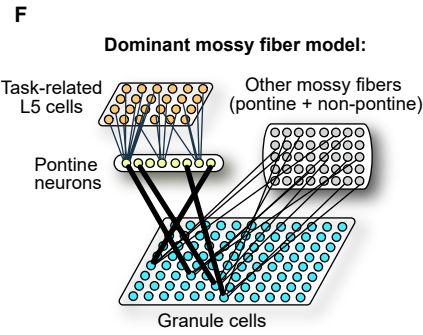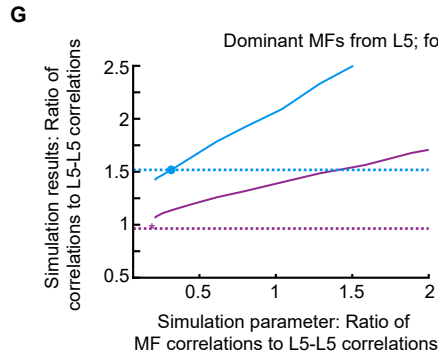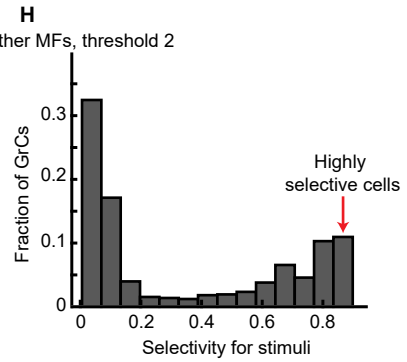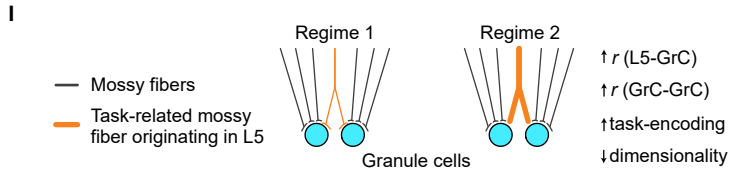

Supplement: NIHMS1521904-supplement-4.pdf [file NIHMS1521904-supplement-4.pdf]

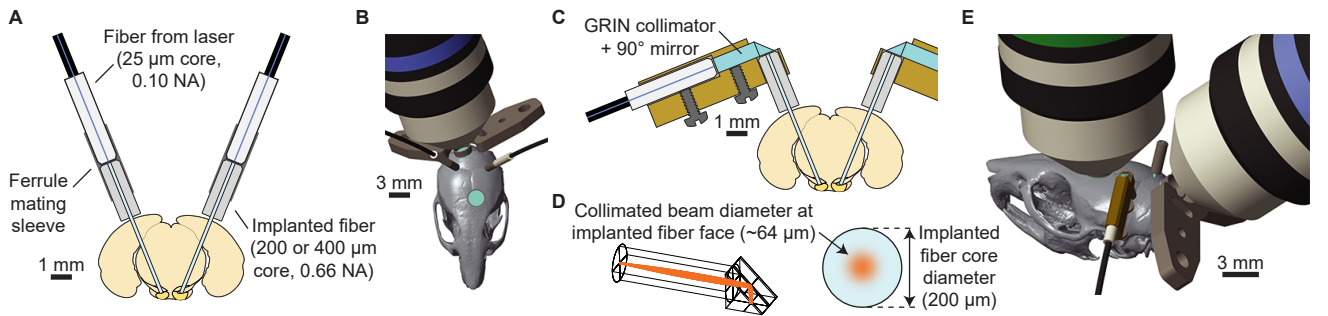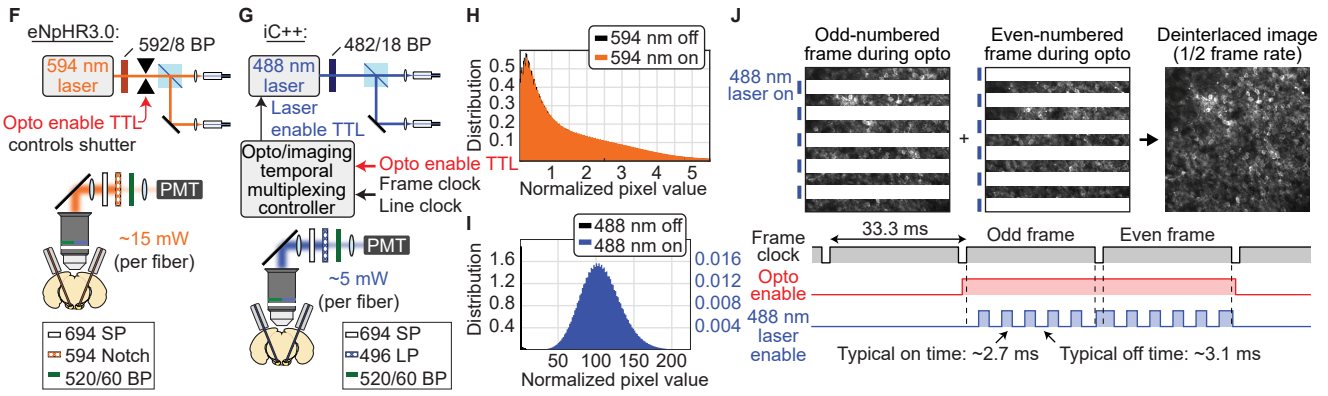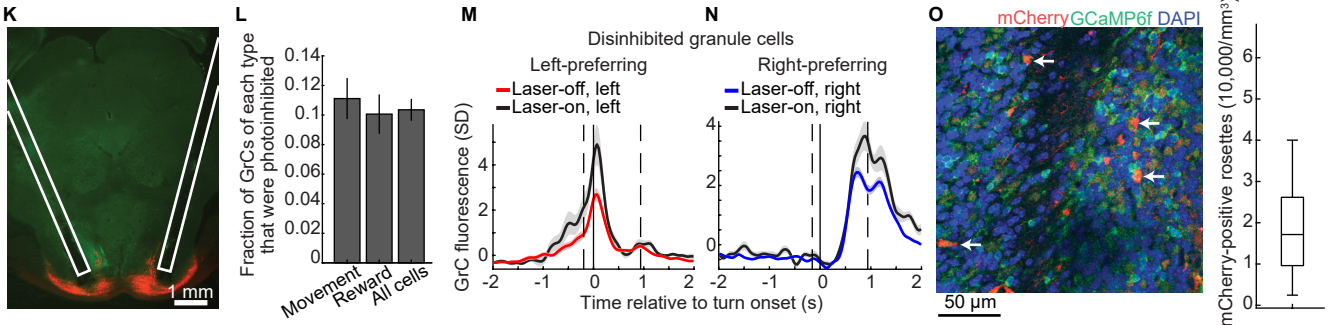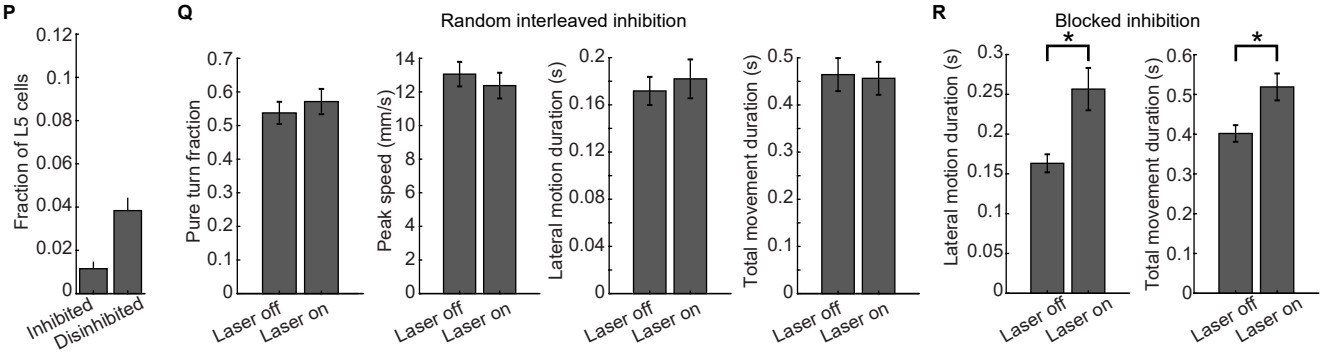

Supplement: NIHMS1521904-supplement-5.pdf [file NIHMS1521904-supplement-5.pdf]

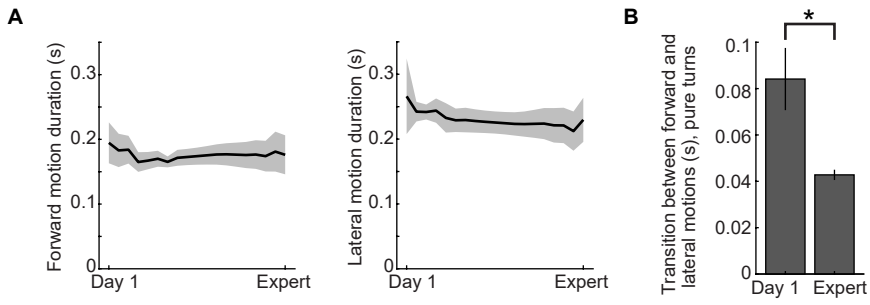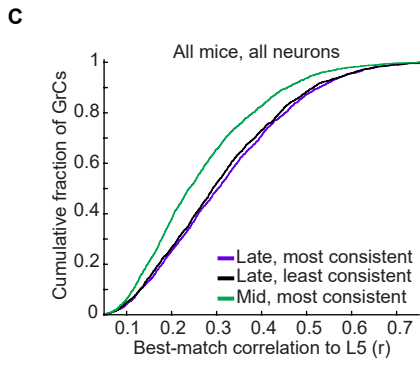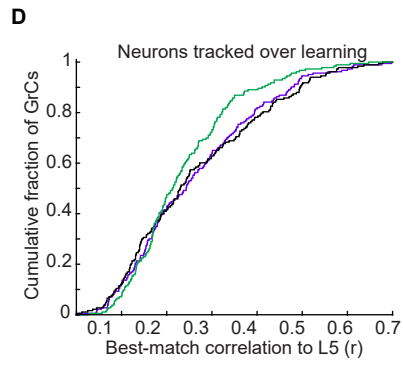

Supplement: NIHMS1521904-supplement-7.pdf [file NIHMS1521904-supplement-7.pdf]
